# Supplementary material for: HRQoL assessment by SRS-30 for Chinese patients with surgery for Adolescent Idiopathic Scoliosis (AIS)
Source: Scoliosis. 2015 Feb 11;10(Suppl 2):S19. doi: 10.1186/1748-7161-10-S2-S19 (PMC4331737; doi:10.1186/1748-7161-10-S2-S19)
Supplement: Additional files 3 — Percentages of patients scoring the 5 domains at Pre-op, Discharge, and Follow-up by gender [file 1748-7161-10-S2-S19-S3.xlsx]

## Sheet: Table 3
Domains	Pre-op		p		Discharge		p		Follow-up		p
	Male	Female			Male	Female			Male	Female
Function/Activity
1 (Worst outcome)	0	0.3	0.124		6.5	4.2	0.811		45	35.2	0.112
2	2.9	2.8			21.7	16.8			0	0
3	4.3	10.1			28.3	28.8			35	50
4	18.8	29.6			15.2	20.9			0	0
5 (Best outcome)	73.9	57.1			28.3	29.3			20	14.8
Pain
1 (Best outcome)	0	0.8	0.003		4.5	3.1	0.622		47.4	43.2	0.302
2	1.1	4			4.5	3.1			0	0
3	13	21			0	5.2			31.6	36.4
4	47.8	27.8			0	5.2			0	0
5 (Worst outcome)	38	45.4			91	83.3			21	20.4
Self-image/Appearance
1 (Worst outcome)	10.9	3.4	0.041		8.7	11	0.815		3.3	4.8	0.056
2	16.3	17.1			30.4	22			0	3.3
3	26.1	33.9			34.8	39.8			26.7	41.8
4	18.5	19.2			21.7	22.5			16.7	9.5
5 (Best outcome)	28.3	26.5			4.3	4.7			53.3	40.7
Mental healtha
1 (Worst outcome)	1.4	1	0.662		-	-			-	-
2	1.4	5.6			-	-			-	-
3	27.5	23.7			-	-			-	-
4	37.7	38			-	-			-	-
5 (Best outcome)	31.9	31.7			-	-			-	-
Satisfaction with management
1 (Worst outcome)	0	2.2	0.939		0	3.1	0.461		0	1.1	0.824
2	8.7	12			9.1	8.3			0	1.1
3	43.5	40.2			36.4	22.9			5	4.4
4	34.8	34.8			18.2	34.4			25	36.3
5 (Best outcome)	13	10.9			36.4	31.3			70	57.1
