# Supplementary material for: HRQoL assessment by SRS-30 for Chinese patients with surgery for Adolescent Idiopathic Scoliosis (AIS)
Source: Scoliosis. 2015 Feb 11;10(Suppl 2):S19. doi: 10.1186/1748-7161-10-S2-S19 (PMC4331737; doi:10.1186/1748-7161-10-S2-S19)
Supplement: Additional files 4 — Linear regression models on the effect of potential risk factors on individual mean domain scores [file 1748-7161-10-S2-S19-S4.xlsx]

## Sheet: Table 4
	Male								Female
	r2	Age		Pre-op Cobb’s		Cobb’s correction with surgery			r2	Age		Pre-op Cobb’s		Cobb’s correction with surgery
		b	P value	b	P value	b	P value			b	P value	b	P value	b	P value
Pre-op domains
Function/Activity	0.269	-0.03	0.559	-0.01	0.09	-	-		0.01	-0.01	0.723	0.004	0.412	-	-
Pain	0.221	-0.1	0.092	0.01	0.173	-	-		0	0	0.863	0.001	0.874	-	-
Self-image/Appearance	0.167	-0.02	0.787	-0.02	0.172	-	-		0.01	0.008	0.698	0	0.567	-	-
Mental health	0.004	0.009	0.894	0	0.815	-	-		0.06	-0.06	0.032	0	0.736	-	-
Satisfaction with management	0.087	-0.08	0.462	0.015	0.294	-	-		0.03	0.004	0.917	-0.01	0.148	-	-
Discharge
Function/Activity	0.06	0.046	0.815	0.006	0.886	0.016	0.819		0.04	0	0.95	0.003	0.826	-0.022	0.152
Pain	0.082	-0.11	0.636	0.029	0.599	-0.067	0.433		0.08	-0.12	0.053	0.029	0.126	-0.014	0.518
Self-image/Appearance	0.283	0.018	0.866	-0.03	0.175	0.073	0.073		0.02	0.03	0.391	0	0.95	-0.007	0.512
Mental health	-	-	-	-	-	-	-		-	-	-	-	-	-	-
Satisfaction with management	0.252	0.021	0.788	-0.02	0.257	0.047	0.108		0.05	0.012	0.645	-0.01	0.513	0.014	0.089
Follow-up
Function/Activity	0.101	0.07	0.695	0.011	0.754	0.012	0.876		0.1	0.001	0.977	0.02	0.133	0.009	0.567
Pain	0.17	0.27	0.36	-0.08	0.229	0.056	0.597		0.03	0.037	0.63	0.016	0.511	-0.035	0.193
Self-image/Appearance	0.176	0.063	0.527	0.012	0.544	0.043	0.329		0.04	0.015	0.608	0.009	0.272	-0.005	0.62
Mental health	-	-	-	-	-	-	-		-	-	-	-	-	-	-
Satisfaction with management	0.752	0.051	0.249	-0.03	0.016	-0.014	0.46		0.04	0.009	0.771	0	0.982	-0.01	0.284
Follow-up – Discharge
Function/Activity	0.156	0.23	0.429	0.032	0.583	-0.079	0.527		0.19	0.026	0.721	0.011	0.549	0.045	0.037
Pain	0.196	0.383	0.259	-0.11	0.158	0.123	0.311		0.05	0.155	0.129	-0.01	0.678	-0.022	0.542
Self-image/Appearance	0.812	0.031	0.701	0.052	0.015	-0.159	0.003		0.09	-0.03	0.675	0.012	0.403	0.016	0.349
Mental health	-	-	-	-	-	-	-		-	-	-	-	-	-	-
Satisfaction with management	0.88	0.066	0.267	-0.01	0.516	-0.123	0.002		0.08	-0.01	0.777	0.011	0.293	-0.021	0.094
r2 – Coefficient of multiple determination
b – Regression coefficient
